# Supplementary material for: Cerebral blood flow and cerebrovascular reactivity correlate with severity of motor symptoms in Parkinson’s disease
Source: PubMed Central journal article supplement — Ther Adv Neurol Disord. 2019 Mar 21;12:1756286419838354. doi: 10.1177/1756286419838354 (PMC6431769; doi:10.1177/1756286419838354), 2019-03-21
Supplement: supplementary.pdf [file supplementary.pdf]

**Supplementary table 1. Demographics of PD and HC subgroups for CVR analysis.**

|                                       | PD<br>(n=13)     | HC<br>(n=13) | PD vs HC<br>p-value |
|---------------------------------------|------------------|--------------|---------------------|
| Males, n (%)                          | 13 (100)         | 11 (84.6)    | 0.141 <sup>a</sup>  |
| Age in yrs, mean (SD)                 | 64.5 (9.9)       | 66.3 (9.3)   | 0.635 <sup>b</sup>  |
| BMI, mean (SD)                        | 25.3 (2.4)       | 25.1 (3.4)   | 0.822 <sup>b</sup>  |
| H&Y, median (IQR)                     | 1.5 (1-1.8)      | -            | -                   |
| UPDRS III, mean (SD)                  | 18.8 (14.3)      | -            | -                   |
| Disease duration in yrs, median (IQR) | 3 (3-4.5)        | -            | -                   |
| Onset laterality, left n (%)          | 6 (46.2)         | -            | -                   |
| Onset symptoms                        |                  |              |                     |
| tremor, n (%)                         | 5 (38.5)         | -            | -                   |
| bradykinesia, n (%)                   | 4 (30.8)         | -            | -                   |
| motor deficits, n (%)                 | 1 (7.7)          | -            | -                   |
| others, n (%)                         | 3 (23.1)         | -            | -                   |
| LEDD, mean (SD)                       | 182.3 (88.9)     | -            | -                   |
| MoCA, median (IQR)                    | 20.2 (22.7-24.8) | -            | -                   |

**Legend:** BMI – body mass index, CVR – cerebrovascular reactivity, HC – healthy controls, H&Y – Hoehn and Yahr scale, IQR – interquartile range, LEDD – Levodopa Dose Equivalent, MoCA – Montreal Cognitive Assessment, PD – Parkinson’s disease, SD – standard deviation, yrs – years, UPDRS III – Unified Parkinson's Disease Rating Scale, part III motor examination total scores.

Chi-squared test (a) and independent samples Student’s t-test (b) were used to evaluate differences between PD and HC groups, as appropriate. P-values lower than 0.05 were considered significant. MoCA scores were corrected according to <sup>26</sup>.

**Supplementary table 2. Median basal CBF in PD and HC groups.**

|                          | PD<br>(n=28)     | HC<br>(n=32)     | PD vs HC<br>p-value |
|--------------------------|------------------|------------------|---------------------|
| Precentral Gyrus         | 27.5 (23.4-29.5) | 29.5 (23.4-32.4) | 0.492               |
| Postcentral Gyrus        | 25.0 (21.2-28.4) | 27.7 (22.7-32.3) | 0.492               |
| Supplementary motor area | 29.7 (27.3-34.3) | 29.5 (24.2-34.8) | 0.847               |
| Striatum                 | 23.7 (20.3-27.0) | 24.1 (21.0-28.4) | 0.767               |
| Pallidum                 | 21.8 (19.6-24.9) | 19.8 (18.0-24.4) | 0.519               |
| Thalamus                 | 23.4 (21.1-28.1) | 25.5 (19.8-30.9) | 0.767               |
| Red nucleus              | 27.6 (23.4-32.7) | 27.7 (23.5-34.9) | 0.767               |
| Substantia nigra         | 24.9 (20.6-31.8) | 26.8 (22.7-31.4) | 0.767               |
| Subthalamic nucleus      | 29.1 (24.0-31.5) | 23.0 (21.2-27.7) | 0.114               |

Legend: CBF – cerebral blood flow, HC – healthy controls, IQR – interquartile range, PD – Parkinson’s disease.

Median basal CBF (IQR) assessed in PD and HC groups, within cortical and subcortical regions of the motor circuit. Independent samples Mann-Whitney U Test was used to evaluate differences between PD and HC groups. P-values lower than 0.05 were considered significant.

**Supplementary table 3. Median CVR in PD and HC groups.**

|                          | PD<br>(n=13)  | HC<br>(n=13)  | PD vs HC<br>p-value |
|--------------------------|---------------|---------------|---------------------|
| Precentral Gyrus         | 2.6 (1.3-3.4) | 2.9 (1.8-3.6) | 0.687               |
| Postcentral Gyrus        | 2.6 (1.6-3.4) | 2.8 (1.9-3.7) | 0.687               |
| Supplementary motor area | 2.1 (1.3-3.1) | 2.0 (1.5-3.3) | 0.687               |
| Striatum                 | 2.3 (1.3-2.4) | 2.0 (1.2-3.5) | 0.869               |
| Pallidum                 | 1.8 (1.6-2.5) | 1.8 (1.2-4.0) | 0.920               |
| Thalamus                 | 3.4 (1.7-3.8) | 1.4 (1.0-2.5) | 0.087               |
| Red nucleus              | 2.9 (1.5-3.9) | 1.5 (0.6-3.0) | 0.250               |
| Substantia nigra         | 2.4 (1.8-4.3) | 1.5 (0.9-2.2) | 0.087               |
| Subthalamic nucleus      | 1.2 (0.5-3.7) | 1.5 (0.5-2.2) | 0.869               |

Legend: HC – healthy controls, IQR – interquartile range, PD – Parkinson’s disease.

Median CVR (IQR) assessed in PD and HC groups, within cortical and subcortical regions of the motor circuit. Independent samples Mann-Whitney U Test was used to evaluate differences between PD and HC groups. P-values lower than 0.05 were considered significant.
